RESEARCH ARTICLE

# Antitrypanosomal therapy for Chagas disease: A single center experience with adverse drug reactions and strategies for enhancing treatment completion

Katherine Reifler<sup>1\*</sup>, Alyse Wheelock<sup>1,2</sup>, Samantha M. Hall<sup>3</sup>, Madolyn Dauphinais<sup>1</sup>, Samuel Roytburd<sup>4</sup>, Michael Maiullari<sup>1</sup>, Alejandra Salazar<sup>1</sup>, Ashley Maldonado<sup>5</sup>, Helen Mahoney West<sup>5</sup>, Julia R. Köhler<sup>5,6</sup>, Elizabeth D. Barnett<sup>7</sup>, Deepa M. Gopal<sup>8</sup>, Davidson H. Hamer<sup>1,9,10‡</sup>, Daniel L. Bourque<sup>1‡</sup>

**1** Section of Infectious Disease, Department of Medicine, Boston University Chobanian & Avedisian School of Medicine, Boston, Massachusetts, United States of America, **2** Section of Preventative Medicine and Epidemiology, Boston University Chobanian & Avedisian School of Medicine, Boston, Massachusetts, United States of America, **3** Department of Environmental Health, Boston University School of Public Health, Boston, Massachusetts, United States of America, **4** Boston University Chobanian and Avedisian School of Medicine, Boston, Massachusetts, United States of America, **5** Division of Infectious Disease, Boston Children's Hospital, Boston, Massachusetts, United States of America, **6** Harvard Medical School, Boston, Massachusetts, United States of America, **7** Section of Pediatric Infectious Disease, Department of Pediatrics, Boston Medical Center and Boston University Chobanian & Avedisian School of Medicine, Boston, Massachusetts, United States of America, **8** Cardiovascular Division, Department of Medicine, Boston University Chobanian & Avedisian School of Medicine, Boston, Massachusetts, United States of America, **9** Department of Global Health, Boston University School of Public Health, Boston, Massachusetts, United States of America, **10** Center for Emerging Infectious Disease Policy & Research, Boston University, Boston, Massachusetts, United States of America

‡ Joint Senior Authors.

\* [Katherine.reifler@bmc.org](mailto:Katherine.reifler@bmc.org)

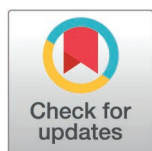

## OPEN ACCESS

**Citation:** Reifler K, Wheelock A, Hall SM, Dauphinais M, Roytburd S, Maiullari M, et al. (2025) Antitrypanosomal therapy for Chagas disease: A single center experience with adverse drug reactions and strategies for enhancing treatment completion. PLoS Negl Trop Dis 19(7): e0013218. <https://doi.org/10.1371/journal.pntd.0013218>

**Editor:** Sarman Singh, Advanced Centre for Chronic and Rare Diseases, INDIA

**Received:** April 7, 2025

**Accepted:** May 28, 2025

**Published:** July 7, 2025

**Copyright:** © 2025 Reifler et al. This is an open access article distributed under the terms of the [Creative Commons Attribution License](https://creativecommons.org/licenses/by/4.0/), which permits unrestricted use, distribution, and reproduction in any medium, provided the original author and source are credited.

**Data availability statement:** All relevant data are within the manuscript and its [Supporting information](#) files.

**Funding:** KR received funding the National Institute of Health NIAID T32 AI 52074-18

## Abstract

Anti-trypanosomal therapy is generally recommended for individuals under age 50 with the indeterminate form of Chagas disease to prevent disease progression. However, benznidazole and nifurtimox are associated with adverse drug reactions. We performed a retrospective review of treatment tolerability among patients with Chagas disease referred to Boston Medical Center from June 2016 to June 2024. There were 125 individuals evaluated, of whom 32 (25.6%) had contraindications to and 2 (1.6%) declined antiparasitic treatment. Ninety-one started therapy (83 with benznidazole, 8 with nifurtimox) with monitoring co-managed by infectious diseases physicians and pharmacists. Following benznidazole initiation, 70 (84.3%) had at least one adverse event, of which allergic (39/83, 47.0%), gastrointestinal (38/83, 45.8%), and neuropsychiatric (33/83, 39.8%) reactions were most common. Rash led to treatment discontinuation in 19 patients (22.9%) and met criteria for grade 3 severity in 13 (15.7%). Adjunctive therapies for rash included topical and systemic steroids and systemic antihistamines. Peripheral neuropathy led to treatment cessation for 13 patients (15.7%). Gastrointestinal adverse effects occurred in 38 patients (45.8%),

training grant. DHH and DLB received funding from the Center for Diseases Control & Prevention Parasitic Diseases Branch NU2GGH002322-01-00 cooperative agreement. The funders did not contribute to the study design, data collection, analysis, decision to publish, or preparation of the manuscript.

**Competing interests:** The authors have declared that no competing interests exist.

were relatively mild, and managed with H2 blockers or proton pump inhibitors. Thirty (36.1%) patients were unable to complete 60 days of benznidazole, of whom 15 switched to nifurtimox. Eight patients started with nifurtimox during a benznidazole shortage. Nifurtimox was more frequently associated with gastrointestinal side effects (21/23, 91.3%) compared to benznidazole. Ultimately, 83 patients (91.2%) received at least 30 days, and 68 patients (74.7%) completed at least 60 days of benznidazole or nifurtimox. Multiple strategies were used to prevent and alleviate adverse events; multi-disciplinary team management was essential. These findings underscore the support needed for individuals with Chagas disease to tolerate and complete therapy and highlight the need for safer and more effective options to facilitate access to treatment.

## Author summary

Chagas disease is caused by a parasitic infection most frequently occurring in Mexico, Central and South America. Approximately 300,000 individuals who migrated from these regions are living with Chagas disease in the US and may benefit from antiparasitic treatment. Yet many US providers are unfamiliar with treatment eligibility and management. Treatment with the two currently available medications (benznidazole and nifurtimox) is frequently associated with adverse drug reactions (ADRs) which can be challenging to manage. This study retrospectively described management of patients living with Chagas disease who were treated by a multidisciplinary team at Boston Medical Center. Most initiated treatment with benznidazole, but some were treated with nifurtimox due to benznidazole intolerance or shortage. Eighty-five percent of individuals who took benznidazole and 100% who took nifurtimox experienced ADRs. The most common benznidazole-associated ADR category was allergic, whereas for nifurtimox it was gastrointestinal. Despite significant ADRs, 75% completed the recommended 60 days of therapy, and 91% completed at least one month of therapy. This analysis underscores the significant side effect burden of currently available therapies for Chagas disease and that intensive treatment monitoring and support facilitates treatment completion. Tolerable and safe therapies are needed to expand access and improve treatment success.

## Introduction

Chagas disease (CD) is a neglected parasitic disease endemic to continental Latin America. Approximately 300,000 people are living with CD in the United States (US) [1]. Life-threatening cardiomyopathy or gastrointestinal sequelae develop in about 30% of people usually 10–30 years after initial infection with the parasite, *Trypanosoma cruzi* [2]. Although not entirely understood, this progression to advanced disease is thought to be triggered by persistent parasite infection in addition to

immune-mediated tissue damage [3,4]. There are at least six different discrete type units (DTU) of *T. cruzi* which vary across geographic regions and along with host factors may explain the different manifestations of infection [5,6].

Two trypanocidal medications, benznidazole and nifurtimox, are used for treatment of Chagas disease and are available in the US [7,8]. Although the exact mechanisms of action are unknown, both are pro-drugs activated by the parasite's mitochondrial nitroreductase to create metabolites that damage the parasite's genomic DNA [9]. International and domestic guidelines [2018 American Heart Association (AHA), the Centers for Disease Control and Prevention, and 2019 Pan American Health Organization (PAHO)] do not state a preferred treatment regimen, but benznidazole is preferred by most experts as first-line therapy [10–12]. Treatment with benznidazole or nifurtimox prevents congenital transmission [13–15], is associated with high parasite clearance rates for acute [16], congenital [17], and early chronic infection in children [18], and may minimize disease progression in adults with chronic indeterminate (without organ damage) infection [19–22]. Antitrypanosomal therapy is recommended for these individuals given some evidence indicating it may prevent disease progression and improve mortality [10,11,19,23]. Despite potential eligibility for treatment, it is estimated that less than 1% of people living with CD in the US receive antiparasitic treatment [24].

Several barriers to treatment persist in non-endemic countries including cost and access to the medications [25], availability of specialist physicians and medication tolerability [26–28]. Adverse drug reactions (ADRs) to benznidazole and nifurtimox are common, particularly in adults [4,8,29–32]. The most common ADRs noted with benznidazole include rash, headache, anorexia, and irreversible neuropathy [30]. The most common ADRs observed with nifurtimox include anorexia, nausea, headache, and fatigue [4]. ADRs can be severe and lead to treatment termination; in a review of 30 patients treated in the US with benznidazole, all 30 had ADRs including 12 that were categorized as severe, though none were listed as life-threatening [31]. In a review of 176 patients treated 2008–2016 at a single site in Switzerland, at least one ADR was observed in 89.8% and ADRs predicted early treatment termination [29]. Despite the known high incidence of antitrypanosomal ADRs, guidance for clinicians for managing ADRs are limited.

In this study we aimed to 1) describe the incidence and severity of ADRs to benznidazole and nifurtimox in a cohort of individuals living in the Boston area who are predominantly from Central America; 2) determine risk factors associated with incomplete treatment; and 3) describe management and ADR mitigating factors among those who experienced ADRs and completed treatment. We hypothesize that a multidisciplinary management team approach to guide patients through Chagas disease therapy would improve treatment completion rates.

## Methods

### Ethics statement

The study data were collected as secondary data and are presented in aggregate without any identifying information and individual consent was not obtained. Research approval was obtained by the Institutional Review Board of BMC and community board approval from East Boston Neighborhood Health Center (H-39646) to view health center laboratory results.

### Study setting, protocol, and data collection

We conducted a single-site retrospective analysis of adult patients aged 18 years or older diagnosed with Chagas disease. Individuals included in the study underwent evaluation for antitrypanosomal therapy between January 2016 and June 2024 at the Center for Infectious Diseases (CID) at Boston Medical Center (BMC), a large academic safety net hospital located in Boston, Massachusetts. Most patients were identified through Chagas disease screening via the Strong Hearts Project at the East Boston Neighborhood Health Center [33].

Individuals were considered to have a diagnosis of Chagas disease if they had at least two positive serologic assays with distinct assays using different antigens. After an initial evaluation which included baseline blood chemistries, complete blood count, electrocardiogram (ECG), and transthoracic echocardiogram (TTE) with contrast, patients were staged using the American Heart Association (AHA) classification of Chagas disease (see [S1 Table](#)), according to standard

clinical practice [34,35]. Screening for strongyloidiasis and latent tuberculosis was also done given the possibility of corticosteroid exposure during antitrypanosomal therapy and the risk of disseminated strongyloidiasis or tuberculosis reactivation [36–38]. Individuals with dyspepsia or epigastric pain were tested for *Helicobacter pylori* infection and, if positive, were treated prior to antitrypanosomal therapy. Chart review of infectious disease pharmacists' and physicians' notes in the electronic medical record was performed through September 2024 for demographic data, medical comorbidities, and treatment course, including medication dosing, duration of therapy, and ADRs.

Benznidazole was recommended as first-line therapy for adults ages 18–50 in the indeterminate stage without advanced heart disease, according to expert guidelines [10,11,39]. Nifurtimox was considered second-line therapy given potential for greater rates of ADRs and higher pill burden [12]. Treatment was considered for some patients over age 50 and for some individuals with evidence of early Chagas cardiomyopathy through shared decision-making with the patient and discussion with a heart failure specialist [10,40]. Pregnant people and patients with multiple medical comorbidities, at the discretion of the infectious disease clinician, were not offered antitrypanosomal therapy given toxicity concerns.

Initially, the benznidazole dosing was based on the Center for Disease Control and Prevention (CDC) recommendation to give 5 mg/kg/day up to 300 mg/day for 60 days—with extension past 60 days to complete the equivalent dose [2]. In 2019, the treatment approach changed to cap the dose at 300 mg daily for 60 days, regardless of the patient's weight based on CDC and international guidelines [10]. Patients with benznidazole intolerance were switched to nifurtimox 8–10 mg/kg/day. Nifurtimox duration was initially set at 90 days until 2021, when the therapy duration was reduced based on a pediatric study that demonstrated acceptable seroconversion and seroreduction with a 60 day course of treatment [10,12,41,42]. In more recent years, there was a lower threshold to stop treatment between 30–60 days if ADRs developed, given mounting evidence supporting shorter treatment durations [43,44]. Both benznidazole and nifurtimox have been available since gaining FDA approval (benznidazole in 2017 for children aged 2–12 years old; nifurtimox from birth to age 18 in 2020). Prior to their approvals, they were obtained via the CDC investigational drug protocol [7,8].

While on treatment, follow-up appointments were scheduled every two weeks with an infectious disease pharmacist and monthly with an infectious disease physician. At each follow-up appointment, patients were asked about the occurrence of any benznidazole or nifurtimox ADRs. Specific ADRs were managed according to their severity and at the clinician's discretion. Mild and moderate ADRs were initially managed medically. For example, anti-histamine-1 blockers, topical steroids, and/or oral steroids for itching or rash, H2 blockers or proton pump inhibitors for dyspepsia, antiemetics for nausea or anorexia, and analgesics for headache. Treatment was suspended temporarily (for days to weeks) when an ADR failed to improve with medical management. Antitrypanosomal therapy then was restarted at a low dose and gradually increased until reaching the target dose as tolerated [45]. Therapy was stopped for severe or potentially irreversible reactions, such as angioedema or peripheral neuropathy.

## Study definitions

Treatment duration was defined as days on target dose of antitrypanosomal therapy. The target dose and durations were defined above. Days of missed and/or below target dose of therapy were not counted for patients receiving the dose escalation strategy. ADR was defined as any symptom that started or worsened after initiation of the antitrypanosomal medication without a clear alternative explanation. The Common Terminology Criteria for Adverse Events (CTCAE v5.0) was used to determine ADR severity (1 = mild, 2 = moderate, 3 = severe, 4 = life-threatening, 5 = death) [46]. ADRs were grouped into allergic, gastrointestinal, neuropsychiatric, and systemic symptoms.

## Analysis

Descriptive analysis was stratified by antiparasitic treatment duration and type of antiparasitic therapy received to evaluate frequency, timing, and severity of ADRs. Standard deviation (SD) was calculated for the mean age of patients in the study. Chi-square analysis was used to assess any statistically significant difference in the proportion of ADR experience by

treatment type (benznidazole vs nifurtimox), and to evaluate differences in demographic and clinical characteristics across those who did and did not complete therapy. Analyses were conducted in Rstudio (version 12.1; RStudio Team, 2024).

## Results

Of the 161 patients diagnosed with Chagas disease, 36 were excluded from analysis due to loss to follow-up ( $n = 19$ ) or incomplete evaluation at the time of analysis ( $n = 17$ ) [S2 Table] and 125 completed evaluation for antiparasitic treatment [Fig 1]. Approximately 26% (32/125) were considered to have contraindications to therapy, including cardiac disease (16/32, 50%), advanced age (13/32, 41%), pregnancy (9/32, 28%), and/or other comorbidities (1/32, 3%); some had multiple contraindications. Most individuals (93/125, 74%) were considered eligible for antiparasitic therapy and 98% (91/93) of eligible individuals agreed to treatment. Two declined therapy.

### Cohort characteristics

Among those individuals who were candidates for treatment, 67% (84/125) were female. Most individuals migrated from Central America (95%, 119), a minority from South America (5%, 6), and none from Mexico; females comprised 67% (84/125) [Table 1]. The mean age was 44 years (SD 13). Additional comorbidities in this cohort included diabetes mellitus (15%, 19/125), coronary artery disease (12%, 15/125), chronic kidney disease (3%, 4/125), baseline liver dysfunction (6%, 7/125), strongyloidiasis seropositivity (14%, 17/125), and latent tuberculosis (14%, 18/125). Among individuals with possible symptoms of *H. pylori* infection who were tested, 47% (59/84) were positive and all received *H. pylori* treatment prior to antiparasitic therapy initiation.

With respect to cardiac status, more than half had no evidence of cardiomyopathy (51%, 64/125 AHA stage A), approximately one-third had evidence of early cardiac changes (30%, 37/125 AHA stage B1), and 18% (22/125) had evidence of Chagas cardiomyopathy stage B2 or higher [Table 1]. Among 91 individuals who initiated therapy, 54 (59%) were stage A, 32 (35%) were stage B1, and 5 (6%) were stage B2. No stage C or D individual initiated therapy.

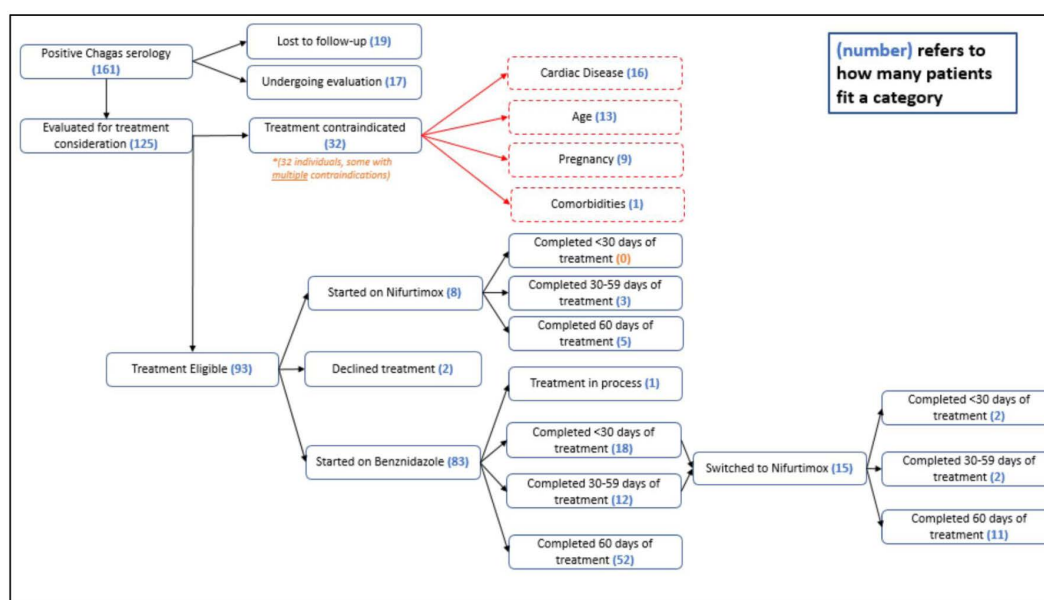

Fig 1. Antitrypanosomal Therapy Care Cascade.

<https://doi.org/10.1371/journal.pntd.0013218.g001>



**Table 1. Chagas Disease Cohort Baseline Characteristics, Stratified by Antitrypanosomal Therapy Initiation and Therapy Completion Status.**

|                                            | Total completed evaluation for anti-parasitic therapy (N = 125) | Treatment contra-indicated (N = 32) | Treatment eligible (N=93)        |                                              |                                                 |                                                     | Declined treatment, N=2 |
|--------------------------------------------|-----------------------------------------------------------------|-------------------------------------|----------------------------------|----------------------------------------------|-------------------------------------------------|-----------------------------------------------------|-------------------------|
|                                            |                                                                 |                                     | Initiated treatment (N=91)       |                                              |                                                 |                                                     |                         |
|                                            |                                                                 |                                     | Initiated treatment total (N=91) | Incomplete therapy <30 days (BNZ or NFX) N=7 | Incomplete therapy (30–59 days BNZ or NFX) N=15 | Complete therapy (at least 60 days BNZ or NFX) N=68 |                         |
| Female, n (%)                              | 84 (67.2%)                                                      | 22 (68.8%)                          | 60 (65.9%)                       | 5/7 (71.4%)                                  | 10 (66.7%)                                      | 44 (64.7%)                                          | 2 (100%)                |
| Country of birth, n (%)                    |                                                                 |                                     |                                  |                                              |                                                 |                                                     |                         |
| Central America                            | 119 (95.2%)                                                     | 29 (90.6%)                          | 88 (96.7%)                       | 7 (100%)                                     | 15 (100%)                                       | 65 (95.6%)                                          | 2 (100%)                |
| South America                              | 6 (4.8%)                                                        | 3 (9.4%)                            | 3 (3.3%)                         |                                              |                                                 | 3 (4.4%)                                            |                         |
| Age (years), mean (SD)                     | 44 (13)                                                         | 52 (17)                             | 42 (11)                          | 41 (8)                                       | 40 (8)                                          | 42 (12)                                             | 54 (0)                  |
| AHA cardiomyopathy stage, n (%)            |                                                                 |                                     |                                  |                                              |                                                 |                                                     |                         |
| A                                          | 64 (51.2%)                                                      | 8 (25.0%)                           | 54 (59.3%)                       | 5 (71.4%)                                    | 9 (60.0%)                                       | 40 (58.8%)                                          | 2 (100%)                |
| B1                                         | 37 (29.6%)                                                      | 5 (15.6%)                           | 32 (35.2%)                       | 2 (28.6%)                                    | 4 (26.7%)                                       | 25 (36.8%)                                          |                         |
| B2                                         | 9 (7.2%)                                                        | 4 (12.5%)                           | 5 (5.5%)                         |                                              | 2 (13.3%)                                       | 3 (4.4%)                                            |                         |
| C                                          | 12 (9.6%)                                                       | 12 (37.5%)                          |                                  |                                              |                                                 |                                                     |                         |
| D                                          | 1 (0.8%)                                                        | 1 (3.1%)                            |                                  |                                              |                                                 |                                                     |                         |
| Missing                                    | 2 (1.6%)                                                        | 2 (6.3%)                            |                                  |                                              |                                                 |                                                     |                         |
| Diabetes mellitus status, n (%)            |                                                                 |                                     |                                  |                                              |                                                 |                                                     |                         |
| Diabetes mellitus                          | 19 (15.2%)                                                      | 9 (28.1%)                           | 8 (8.8%)                         | 1 (14.3%)                                    | 1 (6.7%)                                        | 5 (7.3%)                                            | 2 (100%)                |
| Missing                                    | 18 (14.4%)                                                      | 5 (15.6%)                           |                                  |                                              |                                                 |                                                     |                         |
| CAD status, n (%)                          |                                                                 |                                     |                                  |                                              |                                                 |                                                     |                         |
| CAD                                        | 15 (12%)                                                        | 13 (40.6%)                          | 2 (2.2%)                         |                                              |                                                 | 2 (2.9%)                                            |                         |
| Missing                                    | 7 (5.6%)                                                        | 2 (6.3%)                            |                                  |                                              | 1 (6.7%)                                        |                                                     | 1 (50%)                 |
| CKD status, n (%)                          |                                                                 |                                     |                                  |                                              |                                                 |                                                     |                         |
| CKD                                        | 4 (3.2%)                                                        | 4 (12.5%)                           |                                  |                                              |                                                 |                                                     |                         |
| Missing                                    | 3 (2.4%)                                                        | 3 (9.4%)                            |                                  |                                              |                                                 |                                                     |                         |
| Baseline liver dysfunction status, n (%)   |                                                                 |                                     |                                  |                                              |                                                 |                                                     |                         |
| Liver dysfunction                          | 7 (5.6%)                                                        | 2 (6.3%)                            | 5 (5.5%)                         |                                              | 1 (6.7%)                                        | 4 (5.9%)                                            |                         |
| Missing                                    | 8 (6.4%)                                                        | 5 (15.6%)                           |                                  |                                              |                                                 |                                                     |                         |
| Helicobacter pylori status, n (%)**        |                                                                 |                                     |                                  |                                              |                                                 |                                                     |                         |
| H. pylori positive                         | 59/84 (47.2%)                                                   | 9/17 (52.9%)                        | 48/65 (73.8%)                    | 3/3 (100%)                                   | 9/11 (81.8%)                                    | 36/50 (72%)                                         | 2/2 (100%)              |
| Strongyloidiasis status, n (%)             |                                                                 |                                     |                                  |                                              |                                                 |                                                     |                         |
| Strongyloides stercoralis IgG seropositive | 17 (13.6%)                                                      | 3 (9.4%)                            | 14 (15.4%)                       |                                              | 2 (13.3%)                                       | 12 (17.6%)                                          |                         |
| Missing                                    | 19 (15.2%)                                                      | 10 (3.1%)                           |                                  | 1 (14.3%)                                    |                                                 |                                                     |                         |
| QuantiFERON gold status, n (%)             |                                                                 |                                     |                                  |                                              |                                                 |                                                     |                         |
| QuantiFERON gold positive                  | 18 (14.4%)                                                      | 4 (12.5%)                           | 14 (15.4%)                       | 1 (14.3%)                                    | 1 (6.7%)                                        | 12 (17.6%)                                          |                         |
| Missing                                    | 19 (15.2%)                                                      | 10 (3.1%)                           |                                  |                                              |                                                 |                                                     |                         |

BNZ = benznidazole; NFX = Nifurtimox; AHA = American Heart Association; CAD = coronary artery disease; CKD = chronic kidney disease; *H. pylori* = *helicobacter pylori*.

\*\**H. pylori* only sent in those with concerning symptoms.

<https://doi.org/10.1371/journal.pntd.0013218.t001>

## Antiparasitic therapy completion

Among 91 patients who started therapy, most (83, 91%) initiated first-line benznidazole [Fig 1]. However, this study included a period of benznidazole shortage in the US during which nifurtimox was started as an alternative therapy for 8 individuals (9%). Similar proportions completed  $\geq 60$  days of the first drug prescribed: 61% (51/83) with benznidazole and 63% (5/8) with nifurtimox. Many were unable to tolerate 60 days of therapy; 23% (18/83) who started benznidazole completed  $<30$  days of therapy, 14% (12/83) completed between 30–59 days, and one individual was still receiving treatment at the time of analysis. Amongst 30 individuals who could not complete 60 days of benznidazole, half were switched to nifurtimox and 11 of 15 completed 60 days of nifurtimox. The remaining 4 individuals could not complete therapy with either benznidazole or nifurtimox. No patients that were initiated on nifurtimox treatment for  $<60$  days were switched to benznidazole. Overall, 83 patients (91%) received at least one month, and 68 patients (75%) completed at least 60 days of either benznidazole or nifurtimox [Table 1].

## Adverse drug reactions

ADRs were common, occurring in 84% (70/83) who received benznidazole and 100% (23/23) of those who received nifurtimox [Table 2]. Amongst 83 individuals who received benznidazole, allergic ADRs were most common (39, 47%). Rash, the most common allergic benznidazole ADR subtype (36/83, 43%), was severe for 13 (16%) individuals and led to treatment discontinuation in 19 (23%). Two people developed angioedema and one developed drug reaction with eosinophilia and systemic symptoms (DRESS). Five individuals had a non-severe transaminase rise, and all returned to baseline with medication pause. Overall, benznidazole gastrointestinal ADRs were less severe and less likely to necessitate treatment discontinuation. The most common neuropsychiatric benznidazole ADR subtype, peripheral neuropathy, occurred in 17 patients (21%) and led to treatment discontinuation in 13 (16%). No individual developed peripheral neuropathy categorized as severe. For the 4 individuals who did not stop therapy due to peripheral neuropathy, reasons included the patient notifying the pharmacist about their ADR after therapy completion ( $n=2$ ) and the symptom initially not thought to be neuropathy ( $n=2$ ).

Compared to benznidazole, nifurtimox was associated with more frequent gastrointestinal side effects (21/23 or 91% vs 36/83 or 43%;  $p$ -value 0.003). Two individuals had severe gastrointestinal ADRs to nifurtimox including multiple visits to the emergency department within one week for dyspepsia/abdominal pain or nausea and leading to treatment discontinuation. Neuropsychiatric ADRs were also more common in those treated with nifurtimox compared to benznidazole (15/23 or 65% vs 33/83 or 40%,  $p$ -value 0.053). Peripheral neuropathy was the most common neuropsychiatric nifurtimox ADR subtype and led to therapy discontinuation in 3 people, although no reaction was severe. Allergic nifurtimox ADRs were less frequent compared to benznidazole, although 3 individuals had severe allergic nifurtimox ADRs, including angioedema in one person.

## Adverse drug reaction timing

Timing of initiation of therapy to ADR onset is shown in Figs 2 and 3. Most ADRs started within the first month of therapy. For benznidazole, gastrointestinal symptoms typically started earlier (median onset at 8.5 days), and allergic, systemic, and neuropsychiatric reactions (including peripheral neuropathy) typically started at approximately 2 weeks of therapy [Fig 2]. There was a wide range of ADR onset, particularly because this analysis included a period when the recommended dosing was cumulative weight-based without a duration cap, and some individuals with higher weights had  $>60$  days of therapy. The median onset of allergic and gastrointestinal ADRs for nifurtimox occurred a few days later (allergic: 16 days nifurtimox versus 14 days benznidazole; gastrointestinal: 14 days nifurtimox versus 8.5 days benznidazole), and those of neuropsychiatric ADRs occurred a few days earlier (10 days nifurtimox versus 14 days benznidazole) than for benznidazole. Median onset of systemic symptoms was similar (12 days for both nifurtimox and benznidazole). Similar to benznidazole, the median onset of nifurtimox ADRs overall started after approximately 2 weeks of therapy.

Table 2. Adverse Drug Reactions Associated with Benznidazole and Nifurtimox Therapy.

| Adverse Drug Reaction       | Benznidazole (N=83), n(%) |                                          |                 |                            | Nifurtimox (N=23), n (%) |                                          |                 |                            | Proportion of ADRs associated with BNZ vs NFX (p-value) |
|-----------------------------|---------------------------|------------------------------------------|-----------------|----------------------------|--------------------------|------------------------------------------|-----------------|----------------------------|---------------------------------------------------------|
|                             | Total                     | ADR leading to treatment discontinuation | Severity, n (%) | Severe or worse (grade ≥3) | Total                    | ADR leading to treatment discontinuation | Severity, n (%) | Severe or worse (grade ≥3) |                                                         |
| <b>Any AE</b>               | 70/83 (84.3%)             |                                          |                 |                            | 23/23 (100%)             |                                          |                 |                            | 0.095                                                   |
| <b>Allergic</b>             | 39/83 (47%)               |                                          |                 |                            | 10/23 (43.5%)            |                                          |                 |                            | 0.950                                                   |
| Rash                        | 36/83 (43.4%)             | 19/36 (52.8%)                            | 4/36 (11.1%)    | 13/36 (36.1%)              | 6/23 (26.1%)             | 2/6 (33.3%)                              | 3/6 (50.0%)     | 2/6 (33.3%)                |                                                         |
| Pruritis                    | 7/83 (8.4%)               | 1/7 (14.3%)                              | 2/7 (28.6%)     | 1/7 (14.2%)                | 4/23 (17.4%)             | 1/4 (25.0%)                              | 3/4 (75.0%)     |                            |                                                         |
| Angioedema                  | 2/83 (2.4%)               | 2/2 (100%)                               |                 | 2/2 (100%)                 | 1/23 (4.3%)              | 1/1 (100%)                               |                 | 1/1 (100%)                 |                                                         |
| DRESS                       | 1/83 (1.2%)               | 1/1 (100%)                               |                 | 1/1 (100%)                 |                          |                                          |                 |                            |                                                         |
| <b>Gastrointestinal</b>     | 38/83 (45.8%)             |                                          |                 |                            | 21/23 (91.3%)            |                                          |                 |                            | 0.0003                                                  |
| Dyspepsia/abdominal pain    | 15/83 (18.1%)             | 1/15 (6.7%)                              | 12/15 (80.0%)   | 3/15 (20.0%)               | 9/23 (39.1%)             | 2/9 (22.2%)                              | 5/9 (55.6%)     | 3/9 (33.3%)                | 1/9 (11.1%)                                             |
| Nausea                      | 11/83 (13.3%)             | 1/11 (9.1%)                              | 7/11 (63.6%)    | 4/11 (36.4%)               | 9/23 (39.1%)             | 2/9 (22.2%)                              | 4/9 (44.4%)     | 4/9 (44.4%)                | 1/9 (11.1%)                                             |
| Heartburn                   | 10/83 (12.0%)             | 1/10 (10.0%)                             | 5/10 (50.0%)    | 5/10 (50.0%)               | 7/23 (30.4%)             | 1/7 (14.3%)                              | 1/7 (14.3%)     | 6/7 (86.7%)                |                                                         |
| Anorexia/decreased appetite | 8/83 (9.6%)               |                                          | 7/8 (87.5%)     | 1/8 (12.5%)                | 7/23 (30.4%)             | 1/7 (14.3%)                              | 4/7 (57.1%)     | 3/7 (42.9%)                |                                                         |
| Bloating                    | 7/83 (8.4%)               |                                          | 6/7 (85.7%)     | 1/7 (14.2%)                |                          |                                          |                 |                            |                                                         |
| Diarrhea                    | 3/83 (3.6%)               |                                          | 2/3 (66.7%)     | 1/3 (33.3%)                |                          |                                          |                 |                            |                                                         |
| Dysgeusia                   | 1/83 (1.2%)               |                                          | 1/1 (100%)      |                            | 5/23 (21.7%)             | 1/5 (20.0%)                              | 3/5 (60.0%)     | 2/5 (40.0%)                |                                                         |
| Constipation                | 1/83 (1.2%)               |                                          | 1/1 (100%)      |                            |                          |                                          |                 |                            |                                                         |
| Vomiting                    | 1/83 (1.2%)               |                                          | 1/1 (100%)      |                            | 3/23 (13.0%)             | 2/3 (66.7%)                              |                 | 2/3 (66.7%)                | 1/3 (33.3%)                                             |
| <b>Neuropsychiatric</b>     | 33/83 (39.8%)             |                                          |                 |                            | 15/23 (65.2%)            |                                          |                 |                            | 0.053                                                   |
| Peripheral neuropathy       | 17/83 (20.5%)             | 13/17 (76.5%)                            | 7/17 (41.2%)    | 10/17 (58.8%)              | 8/23 (34.8%)             | 3/8 (37.5%)                              | 5/8 (62.5%)     | 3/8 (37.5%)                |                                                         |
| Headache                    | 11/83 (13.3%)             |                                          | 10/11 (90.9%)   | 1/11 (9.1%)                | 7/23 (30.4%)             | 2/7 (28.6%)                              | 5/7 (71.4%)     | 2/7 (28.6%)                |                                                         |
| Dizziness/vertigo           | 6/83 (7.2%)               |                                          | 6/6 (100%)      |                            | 3/23 (13.0%)             | 1/3 (33.3%)                              | 1/3 (33.3%)     | 2/3 (66.7%)                |                                                         |
| Insomnia                    | 3/83 (3.6%)               |                                          | 1/3 (33.3%)     | 2/3 (66.7%)                | 4/23 (17.4%)             | 1/4 (25.0%)                              | 1/4 (25.0%)     | 3/4 (75.0%)                |                                                         |
| Anxiety                     |                           |                                          |                 |                            | 1/23 (4.3%)              |                                          | 1/1 (100%)      |                            |                                                         |
| <b>Systemic</b>             | 30/83 (36.1%)             |                                          |                 |                            | 7/23 (30.4%)             |                                          |                 |                            | 0.794                                                   |
| Fatigue                     | 11/83 (13.3%)             |                                          | 11/11 (100%)    |                            | 4/23 (17.4%)             | 1/4 (25.0%)                              | 2/4 (50.0%)     | 2/4 (50.0%)                |                                                         |
| Myalgias                    | 6/83 (7.2%)               |                                          | 2/6 (33.3%)     | 3/6 (50.0%)                |                          |                                          |                 |                            |                                                         |
| Arthralgias                 | 6/83 (7.2%)               |                                          | 3/6 (50.0%)     | 3/6 (50.0%)                |                          |                                          |                 | 1/1 (100%)                 |                                                         |
| Transaminitis               | 5/83 (6.0%)               | 2/5 (40.0%)                              | 3/5 (60.0%)     | 2/5 (40.0%)                | 1/23 (4.3%)              |                                          | 1/1 (100%)      |                            |                                                         |
| Hot flashes                 | 5/83 (6.0%)               |                                          | 4/5 (80.0%)     | 1/5 (20.0%)                |                          |                                          |                 |                            |                                                         |
| Subjective fever            | 4/83 (4.8%)               | 1/4 (25.0%)                              | 3/4 (75.0%)     | 1/4 (25.0%)                | 2/23 (8.7%)              |                                          | 1/2 (50%)       | 1/2 (50%)                  |                                                         |
| Erectile dysfunction        | 1/83 (1.2%)               |                                          | 1/1 (100%)      |                            |                          |                                          |                 |                            |                                                         |
| Creatinine elevation        | 1/83 (1.2%)               | 1/1 (100%)                               | 1/1 (100%)      |                            |                          |                                          |                 |                            |                                                         |
| Palpitations                |                           |                                          |                 |                            | 1/23 (4.3%)              |                                          |                 | 1/1 (100%)                 |                                                         |

<https://doi.org/10.1371/journal.pntd.0013218.t002>



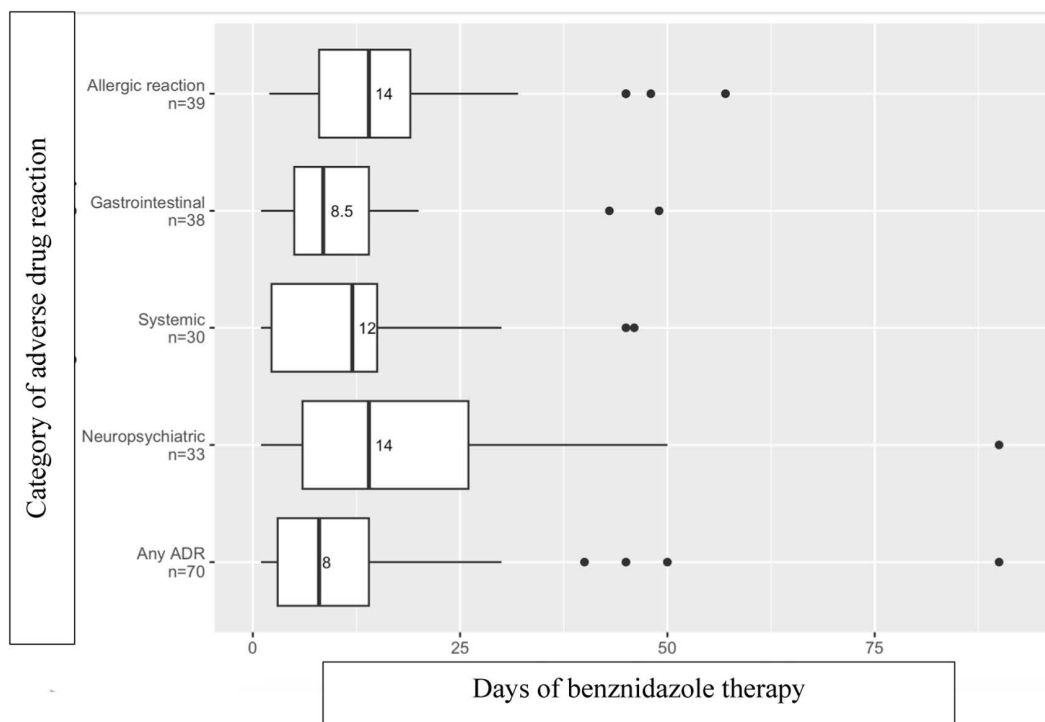

**Fig 2. Days of Therapy to Onset of Adverse Drug Reactions Amongst 83 Individuals Treated with Benznidazole.** Median shown by number and vertical line in box; interquartile range demonstrated by the box boundaries.

<https://doi.org/10.1371/journal.pntd.0013218.g002>

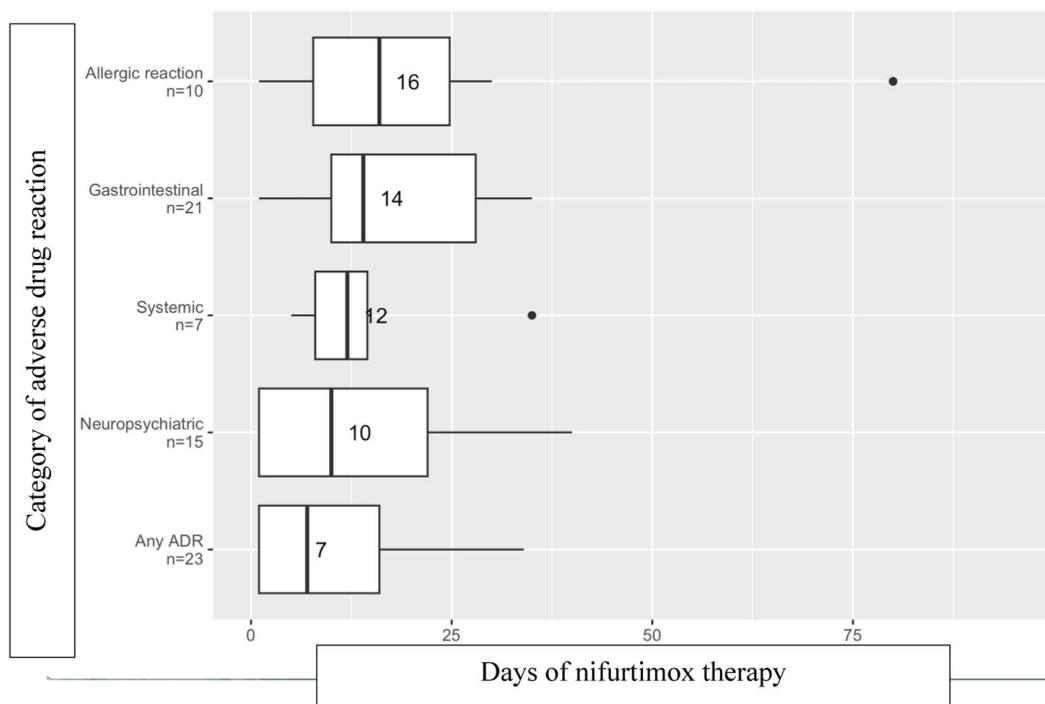

**Fig 3. Days of Therapy to Onset of Adverse Drug Reactions Amongst 23 Individuals Treated with Nifurtimox.** Median shown by number and vertical line in box; interquartile range demonstrated by the box boundaries.

<https://doi.org/10.1371/journal.pntd.0013218.g003>

## Management of adverse drug reactions

Multiple strategies were used to prevent and alleviate adverse drug reactions and allow for treatment completion. Common ADRs and their management are presented in Table 3. Rash and pruritus were common allergic ADRs that were managed with oral antihistamine and/or oral or intravenous steroids, depending on severity. With this approach, 24/37 (65%) of individuals with rash and 7/11 (64%) of individuals with pruritus successfully completed 60 days of therapy. Gastrointestinal ADRs were managed with oral antihistamines if mild or proton pump inhibitors if severe, and 77% of individuals with this management completed therapy. Nausea was managed with serotonin receptor antagonists and bloating with simethicone; 68% and 86% of individuals with these ADRs, respectively, completed therapy. In patients with peripheral neuropathy, an ADR that may be irreversible, therapy was stopped and gabapentin or a topical analgesic added as needed. Forty-three percent (9/21) of individuals who developed peripheral neuropathy completed therapy, either because they did not notify their care team of the symptom until after therapy completion or by switching to second-line nifurtimox. Headaches, myalgias, and arthralgias were managed with over-the-counter acetaminophen or ibuprofen. Individuals who developed asymptomatic mild (grade 1) transaminase elevation compared to baseline were monitored with labs every 2

**Table 3. Management of Common Benznidazole and Nifurtimox Adverse Drug Reactions.**

| ADR category                       | ADR treatment                                                                                     | % Completed ≥ 60 days Chagas therapy |
|------------------------------------|---------------------------------------------------------------------------------------------------|--------------------------------------|
| Allergic                           |                                                                                                   |                                      |
| Rash                               |                                                                                                   | 24/37 (64.9%)                        |
| Mild (grade 1)                     | Topical steroid + oral antihistamine                                                              |                                      |
| Moderate (grade 2)                 | Topical steroid + oral antihistamine; oral steroid if not responsive                              |                                      |
| Severe (grade 3)                   | Oral steroid; IV steroid if not responsive                                                        |                                      |
| Pruritis                           |                                                                                                   | 7/11 (63.6%)                         |
| Mild (grade 1)                     | Oral antihistamine                                                                                |                                      |
| Moderate (grade 2)                 | Topical steroid, oral antihistamine                                                               |                                      |
| Severe (grade 3)                   | N/A                                                                                               |                                      |
| Gastrointestinal                   |                                                                                                   |                                      |
| Dyspepsia/abdominal pain/heartburn |                                                                                                   | 26/34 (76.5%)                        |
| Mild (grade 1)                     | oral H2-blocker                                                                                   |                                      |
| Moderate/severe (grade 2/3)        | proton pump inhibitor                                                                             |                                      |
| Nausea                             |                                                                                                   | 13/19 (68.4%)                        |
| Mild (grade 1)                     | no specific therapy                                                                               |                                      |
| Moderate/severe (grade 2/3)        | 5-HT3 receptor antagonist (i.e., ondansetron)                                                     |                                      |
| Bloating grade 1–2)                | simethicone                                                                                       | 6/7 (85.7%)                          |
| Neuropsychiatric                   |                                                                                                   |                                      |
| Peripheral neuropathy              | Stop therapy; gabapentin and/or topical analgesic as needed                                       | 9/21 (42.9%)                         |
| Headache                           | acetaminophen or ibuprofen                                                                        | 12/18 (66.7%)                        |
| Systemic                           |                                                                                                   |                                      |
| Myalgias/arthralgias               | acetaminophen or ibuprofen                                                                        | 8/11 (72.7%)                         |
| Transaminitis                      |                                                                                                   | 3/6 (50%)                            |
| Mild (grade 1)                     | Monitor labs every 2 weeks; consider pausing therapy and restarting with dose escalation protocol |                                      |
| Moderate/severe grade 2/3)         | stop therapy                                                                                      |                                      |

ADR = adverse drug reaction; H2-blocker = antihistamine-2 blocker; 5-HT3 receptor antagonist = serotonin receptor antagonist.

ADR grade defined according to CTCAE category.

<https://doi.org/10.1371/journal.pntd.0013218.t003>

weeks, but those with moderate or severe (grade 2–3) stopped therapy. Half (3/6) of the individuals who developed transaminase elevation completed therapy safely with this approach.

### Factors associated with incomplete antiparasitic therapy

Several ADR factors were examined to assess their association with patients' inability to complete therapy. Allergic ADRs ( $p$  0.050), neuropsychiatric ADRs ( $p$  0.050), any moderate ADR (grade 2 or worse,  $p$  0.001), or any severe ADR (grade 3 or worse,  $p$  0.012) were associated with an increased likelihood of incomplete treatment [Table 4]. A greater proportion of individuals with incomplete (86%) versus complete (67%) therapy experienced  $\geq 2$  ADRs, but this difference was not significant. Using a dose escalation protocol with initiation of antitrypanosomal treatment resulted in slightly fewer patients who did not complete therapy, though was not statistically significant (11/22 or 50% vs 37/68 or 54%;  $p$  0.909).

### Discussion

This cohort of 125 individuals, primarily from Central America, with Chagas disease assessed for treatment is one of the largest to date in the US to be followed for management of ADRs to benznidazole and nifurtimox. Approximately

**Table 4. Factors Associated with Incomplete Treatment of Benznidazole or Nifurtimox <60 days.**

|                                       | Incomplete treatment (n=22) | Complete treatment (n=68) | Difference in proportion of incomplete vs complete treatment $\geq 60$ days (p-value) |
|---------------------------------------|-----------------------------|---------------------------|---------------------------------------------------------------------------------------|
| <b>Demographic factors (n, %)</b>     |                             |                           |                                                                                       |
| Female                                | 15 (68.2%)                  | 44 (64.5%)                | 0.968                                                                                 |
| Age > 50 years                        | 2 (9.1%)                    | 15 (22.1%)                | 1                                                                                     |
| <b>Medical history factors (n, %)</b> |                             |                           |                                                                                       |
| Baseline CKD                          | 0                           | 0                         | n/a                                                                                   |
| Baseline LFT abnormalities            | 1 (4.5%)                    | 4 (5.9%)                  | 1                                                                                     |
| Diabetes mellitus                     | 2 (9.1%)                    | 5 (7.4%)                  | 1                                                                                     |
| CAD                                   | 0                           | 2 (2.9%)                  | n/a                                                                                   |
| AHA CMY stage B1 (or higher)          | 8 (36.4%)                   | 28 (41.2%)                | 0.881                                                                                 |
| <b>Medication factors (n, %)</b>      |                             |                           |                                                                                       |
| Dose escalation*                      | 11 (50.0%)                  | 37 (54.4%)                | 0.909                                                                                 |
| BNZ Dose > 5 mg/kg/d                  | 3 (13.6%)                   | 8 (11.8%)                 | 1                                                                                     |
| <b>ADR factors** (n, %)</b>           |                             |                           |                                                                                       |
| Allergic ADR                          | 15 (68.2%)                  | 28 (41.2%)                | <b>0.050</b>                                                                          |
| Neuropsychiatric ADR                  | 15 (68.2%)                  | 28 (41.2%)                | <b>0.050</b>                                                                          |
| Gastrointestinal ADR                  | 14 (63.6%)                  | 38 (55.9%)                | 0.695                                                                                 |
| Systemic ADR                          | 9 (40.9%)                   | 25 (36.8%)                | 0.924                                                                                 |
| Any moderate ADR (grade 2 or worse)   | 20 (90.9%)                  | 31 (45.6%)                | <b>0.001</b>                                                                          |
| Any severe ADR (grade 3 or worse)     | 8 (36.4%)                   | 7 (10.3%)                 | <b>0.012</b>                                                                          |
| $\geq 2$ ADRs                         | 19 (86.4%)                  | 45 (66.2%)                | 0.122                                                                                 |

CKD = chronic kidney disease; LFT = liver function test; CAD = coronary artery disease; AHA = American Heart Association; CMY = cardiomyopathy; BNZ = benznidazole; mg/kg/d = milligram per kilogram per day; ADR = adverse drug reaction.

Fisher's exact test used for values <5.

ADR grade defined according to CTCAE category.

\*Individuals who had any dose escalation; if they had dose escalation for both benznidazole and nifurtimox, they are only counted once.

\*\*Individuals who had a particular category of ADR to BNZ or NFX; if they had the same category of ADR to both BNZ & NFX are only counted once.

<https://doi.org/10.1371/journal.pntd.0013218.t004>

three-quarters were considered eligible for antiparasitic treatment and almost every patient who was offered treatment elected to start. More than half were female, perhaps due to more consistent access to health care and screening during pregnancy. ADRs were common, occurring in 84% (70/83) of those who received benznidazole and in 100% (23/23) of those who received nifurtimox. Several patients experienced treatment-limiting ADRs, including most frequently rash and peripheral neuropathy, and some experienced severe ADRs including rash, angioedema, and DRESS. In some cases, the ADRs had additional negative outcomes not necessarily captured by the medical grading system that are particularly disadvantageous in this already vulnerable population, including inability to work or provide childcare during the ADR. Our ADR findings fit within the range of prior studies in endemic and non-endemic regions [47–50].

Several studies have examined whether the effective antiparasitic dose may be lower, as this strategy might minimize ADRs. The BENDITA double-blinded multicenter randomized control trial suggested that therapy duration as short as 14 days compared to the current 60-day standard is associated with similar rates of sustained parasite clearance at 6 months [43]. MULTIBENZ, another recent double-blinded multicenter randomized control trial, demonstrated that lower treatment dose (benznidazole 150 mg/kg/d compared to the current standard of 300 mg/kg/d) for 60 days is associated with similar parasitological clearance at 12 months [44]. Given most ADRs in our cohort started within the first month of therapy, a 30-day therapy duration or lower dose therapy may not avoid ADRs, but perhaps could minimize ADR duration and improve treatment completion rates. The timing of ADR onset in the BENDITA and MULTIBENZ trials aligns with our cohort, with most ADRs occurring within the first 30 days of therapy [43,44]. While these studies show parasite clearance with shorter therapy durations, the impact of a shorter duration and/or dose of antiparasitic therapy on long-term outcomes of people with Chagas disease is unknown.

Despite high rates of ADRs, 91% of patients in our cohort received at least 30 days, and 75% completed at least 60 days of either benznidazole or nifurtimox. At 30 days, treatment completion in our cohort was higher than a pooled completion rate of 14% reported in a systematic review [51]. However, at 60 days, treatment completion in our cohort was similar to, or slightly lower than, treatment completion in other cohorts [32]. We utilized several methods to prevent and mitigate ADRs and improve therapy completion, including dose-escalation, a multidisciplinary care approach that involved frequent follow up with pharmacists and physicians, medical management of ADRs, and, for some individuals, switching therapies. We treated *H. pylori* positive individuals with relevant gastrointestinal complaints prior to starting benznidazole or nifurtimox, a strategy that may decrease gastrointestinal ADRs. We screened for strongyloidiasis and treated with ivermectin if seropositive to minimize potential consequences of oral corticosteroids used to mitigate allergic ADRs. In recent years we initiated therapy with dose-escalation for all patients based on findings in Spain that this approach may improve benznidazole treatment completion at 60 days [52]. This study was not designed to assess the dose escalation strategy, but the proportions of individuals who received the dose-escalation strategy in our cohort who did and did not complete therapy were similar. Prospective studies are needed to confirm the efficacy of this approach [53]. Other methods of potentially mitigating ADRs proposed by other groups include testing for the HLA-B35:05 allele, whose presence may be associated with risk of benznidazole-associated dermatitis, and co-administration of L-ascorbic acid with benznidazole, suggesting that oxidative stress plays a significant role in the mechanism of benznidazole toxicity [54,55]. These strategies are experimental and further research to examine and validate factors associated with antitrypanosomal toxicity is needed.

Strengths of this analysis include a well-characterized cohort in a non-endemic setting with excellent follow-up and frequent monitoring, enabling us to understand the spectrum of ADRs with both Chagas disease therapies that are commercially available in the US. Limitations include the relatively small sample size and inability to perform formal power or multivariable regression analysis, and the imbalance between the number of individuals treated with benznidazole versus nifurtimox. However, most centers that manage large numbers of individuals with Chagas disease start with benznidazole and only change to nifurtimox if the former drug is poorly tolerated [11,56]. The single-center experience with a primarily Central American cohort may limit generalizability to other non-endemic settings with different health systems and/or

more South Americans. Whether treatment ADRs differ between Central and South Americans is not well studied. Another limitation is that the treatment approach was not uniform across the entire cohort because the recommended dosing and medication availability changed throughout the study period. In addition, our approaches to mitigating adverse effects evolved over the course of this study period. Nonetheless, it is unlikely these factors had a significant impact on our findings.

This study underscores the fact that adverse drug events continue to pose major barriers to successful antitrypanosomal treatment and require significant resources to manage. We demonstrate that ADRs were often treatment-limiting, despite frequent monitoring along with ADR mitigation strategies, availability of treatment, and experienced providers. We outline strategies to manage common ADRs, aiming to provide guidance for other providers in their approach to the management of antitrypanosomal therapy. Ultimately, research into mechanisms behind drug toxicity, alternative therapies, and multi-center randomized control trials with long-term outcomes comparing different dosing strategies are needed. Addressing these issues will require concerted efforts in drug development and dedication to high-quality clinical trials to reduce the burden of this neglected disease and improve patient outcomes.

## Supporting information

**S1 Table. American Heart Association Classification of Chagas Cardiomyopathy.** Arrhythmias and conduction disease can occur from B1 through D stages. HF, heart failure; NYHA, New York Heart Association. Adapted from Andrade et al. [55]. This is an Open Access article distributed under the terms of the Creative Commons Attribution License, which permits unrestricted use, distribution, and reproduction in any medium, provided the original author and source are credited.

(DOCX)

**S2 Table. Characteristics of Individuals Lost to Follow Up and Incompletely Evaluated for Antitrypanosomal Therapy.** AHA, American Heart Association.

(DOCX)

## Author contributions

**Conceptualization:** Katherine Reifler, Alyse Wheelock, Davidson H. Hamer, Daniel L. Bourque.

**Data curation:** Katherine Reifler, Samantha M. Hall.

**Formal analysis:** Katherine Reifler, Alyse Wheelock, Samantha M. Hall, Samuel Roytburd.

**Methodology:** Katherine Reifler, Michael Maiullari, Alejandra Salazar, Davidson H. Hamer.

**Project administration:** Madolyn Dauphinais, Michael Maiullari, Alejandra Salazar.

**Supervision:** Elizabeth D. Barnett, Deepa M. Gopal, Davidson H. Hamer, Daniel L. Bourque.

**Writing – original draft:** Katherine Reifler.

**Writing – review & editing:** Katherine Reifler, Alyse Wheelock, Samantha M. Hall, Madolyn Dauphinais, Ashley Maldonado, Helen Mahoney West, Julia R. Köhler, Elizabeth D. Barnett, Deepa M. Gopal, Davidson H. Hamer, Daniel L. Bourque.

## References

1. Manne-Goehler J, Umeh CA, Montgomery SP, Wirtz VJ. Estimating the Burden of Chagas Disease in the United States. *PLoS Negl Trop Dis*. 2016;10(11):e0005033.
2. Rassi A Jr, Rassi A, Marcondes de Rezende J. American trypanosomiasis (Chagas disease). *Infect Dis Clin North Am*. 2012;26(2):275–91. <https://doi.org/10.1016/j.idc.2012.03.002> PMID: 22632639



3. Rassi A, Marin JA. Chronic Chagas cardiomyopathy: a review of the main pathogenic mechanisms and the efficacy of aetiological treatment following the benznidazole. *Mem Inst Oswaldo Cruz*. 2017.
4. Forsyth CJ, Hernandez S, Olmedo W, Abuhamidah A, Traina MI, Sanchez DR. Safety profile of nifurtimox for treatment of Chagas disease in the United States. *Clin Infect Dis*. 2016;63(8):1056–62.
5. Messenger LA, Miles MA, Bern C. Between a bug and a hard place: *Trypanosoma cruzi* genetic diversity and the clinical outcomes of Chagas disease. *Expert Rev Anti Infect Ther*. 2015;13(8):995–1029.
6. Andrade SG, Magalhães JB, Pontes AL. Evaluation of chemotherapy with benznidazole and nifurtimox in mice infected with *Trypanosoma cruzi* strains of different types. *Bull World Health Organ*. 1985;63(4):721–6.
7. Herwaldt BL, Dougherty CP, Allen K, Jolly JP, Brown MN, Yu P. Characteristics of patients for whom benznidazole was released through the CDC-sponsored investigational new drug program for treatment of Chagas disease - United States, 2011–2018. *MMWR Morb Mortal Wkly Rep*. 2018;67(29):803–5.
8. Abbott A, Montgomery SP, Chancey RJ. Characteristics and adverse events of patients for whom nifurtimox was released through CDC-sponsored investigational new drug program for treatment of Chagas disease - United States, 2001–2021. *MMWR Morb Mortal Wkly Rep*. 2022;71(10):371–4.
9. Jayawardhana S, Ward AI, Francisco AF, Lewis MD, Taylor MC, Kelly JM, et al. Benznidazole treatment leads to DNA damage in *Trypanosoma cruzi* and the persistence of rare widely dispersed non-replicative amastigotes in mice. *PLoS Pathog*. 2023;19(11):e1011627. <https://doi.org/10.1371/journal.ppat.1011627> PMID: 37956215
10. Pereiro AC. Guidelines for the diagnosis and treatment of Chagas disease. *Lancet*. 2019;393(10180):1486–7.
11. Nunes MCP, Beaton A, Acquatella H, Bern C, Bolger AF, Echeverría LE, et al. Chagas cardiomyopathy: an update of current clinical knowledge and management: a scientific statement from the American Heart Association. *Circulation*. 2018;138(12):e169–209.
12. Meymandi S, Hernandez S, Park S, Sanchez DR, Forsyth C. Treatment of Chagas Disease in the United States. *Curr Treat Options Infect Dis*. 2018;10(3):373–88.
13. Murcia L, Simón M, Carrilero B, Roig M, Segovia M. Treatment of infected women of childbearing age prevents congenital *Trypanosoma cruzi* infection by eliminating the parasitemia detected by PCR. *J Infect Dis*. 2017;215(9):1452–8.
14. Moscatelli G, Moroni S, Ramírez JC, Warszatska B, Fernanda L, González N. Efficacy of short-course treatment for prevention of congenital transmission of Chagas disease: A retrospective cohort study. *PLoS Negl Trop Dis*. 2024;18(1):e0011895. <https://doi.org/10.1371/journal.pntd.0011895>
15. Edwards MS, Stimpert KK, Bialek SR, Montgomery SP. Evaluation and management of congenital chagas disease in the united states. *J Pediatric Infect Dis Soc*. 2019;8(5):461–9.
16. Cancado JR. Long term evaluation of etiological treatment of chagas disease with benznidazole. *Rev Inst Med Trop Sao Paulo*. 2002;44(1):29–37. PMID: 11896410
17. Alonso-Vega C, Billot C, Torrico F. Achievements and challenges upon the implementation of a program for national control of congenital Chagas in Bolivia: results 2004–2009. *PLoS Negl Trop Dis*. 2013;7(7):e2304. <https://doi.org/10.1371/journal.pntd.0002304>
18. Sosa Estani S, Segura EL, Ruiz AM, Velazquez E, Porcel BM, Yampotis C. Efficacy of chemotherapy with benznidazole in children in the indeterminate phase of Chagas' disease. *Am J Trop Med Hyg*. 1998;59(4):526–9. <https://doi.org/10.4269/ajtmh.1998.59.526> PMID: 9790423
19. Viotti R, Vigliano C, Lococo B, Bertocchi G, Petti M, Alvarez MG, et al. Long-term cardiac outcomes of treating chronic Chagas disease with benznidazole versus no treatment: a nonrandomized trial. *Ann Intern Med*. 2006;144(10):724–34. <https://doi.org/10.7326/0003-4819-144-10-200605160-00006> PMID: 16702588
20. Fabbro DL, Streiger ML, Arias ED, Bizai ML, del Barco M, Amicone NA. Trypanocide treatment among adults with chronic Chagas disease living in Santa Fe city (Argentina), over a mean follow-up of 21 years: parasitological, serological and clinical evolution. *Rev Soc Bras Med Trop*. 2007;40(1):1–10.
21. Soverow J, Hernandez S, Sanchez D, Forsyth C, Flores CA, Viana G, et al. Progression of Baseline Electrocardiogram Abnormalities in Chagas Patients Undergoing Antitrypanosomal Treatment. *Open Forum Infect Dis*. 2019;6(2):ofz012. <https://doi.org/10.1093/ofid/ofz012> PMID: 30793005
22. Hasslocher-Moreno AM, Saraiva RM, Sangenis LHC, Xavier SS, de Sousa AS, Costa AR. Benznidazole decreases the risk of chronic Chagas disease progression and cardiovascular events: A long-term follow up study. *EClinicalMedicine*. 2021;31:100694. <https://doi.org/10.1016/j.eclinm.2020.100694>
23. Oliveira CDL, Cardoso CS, Baldoni NR, Natany L, Ferreira AM, Oliveira LC, et al. Cohort profile update: the main and new findings from the SaMi-Trop Chagas cohort. *Rev Inst Med Trop Sao Paulo*. 2021;63:e75.
24. Manne-Goehler J, Reich MR, Wirtz VJ. Access to care for Chagas disease in the United States: a health systems analysis. *Am J Trop Med Hyg*. 2015;93(1):108–13.
25. Yoshioka K, Manne-Goehler J, Maguire JH, Reich MR. Access to Chagas disease treatment in the United States after the regulatory approval of benznidazole. *PLoS Negl Trop Dis*. 2020 Jun;14(6):e0008398.
26. Stimpert KK, Montgomery SP. Physician awareness of Chagas disease, USA. *Emerg Infect Dis*. 2010;16(5):871–2. <https://doi.org/10.3201/eid1605.091440> PMID: 20409389
27. Ramos-Rincón JM, Mira-Solves JJ, Ramos-Sesma V, Torrús-Tendero D, Llenas-García J, Navarro M. Healthcare professionals and students' awareness of Chagas disease: design and validation of Chagas Level of Knowledge Scale (ChALKS). *Am J Trop Med Hyg*. 2020;103(1):437–44.

28. Wheelock AE, Sandhu SK, Loskill AJ, Marcus RR, Gopal DM, Hamer DH, et al. Testing for Chagas disease in an at-risk population. *J Card Fail*. 2021 Jan;27(1):109–11.
29. Jackson Y, Wyssa B, Chappuis F. Tolerance to nifurtimox and benznidazole in adult patients with chronic Chagas' disease. *J Antimicrob Chemother*. 2020;75(3).
30. Antinori S, Grande R, Bianco R, Traversi L, Cogliati C, Torzillo D. High frequency of adverse reactions and discontinuation with benznidazole treatment for chronic Chagas disease in Milan, Italy. *Clin Infect Dis*. 2015;60(12):1873–5.
31. Miller DA, Hernandez S, Rodriguez De Armas L, Eells SJ, Traina MM, Miller LG. Tolerance of benznidazole in a United States Chagas disease clinic. *Clin Infect Dis*. 2015;60(8).
32. Malone CJ, Nevis I, Fernández E, Sanchez A. A Rapid Review on the Efficacy and Safety of Pharmacological Treatments for Chagas Disease. *Trop Med Infect Dis*. 2021;6(3):128. <https://doi.org/10.3390/tropicalmed6030128> PMID: 34287382
33. Manne-Goehler J, Davis J, Perez JH, Salazar JG, Gomes J, Salazar A. Screening for Chagas disease in East Boston, Massachusetts from 2017 – 2020 reveals 0.9% prevalence. *Open Forum Infect Dis*. 2020;7(Supplement\_1):S431–S431. <https://doi.org/10.1093/ofid/ofaa506.773>
34. Asundi A, Beliaevsky A, Liu XJ, Akaberi A, Schwarzer G, Bisoffi Z, et al. Prevalence of strongyloidiasis and schistosomiasis among migrants: a systematic review and meta-analysis. *Lancet Glob Health*. 2019;7(2):e236–48. [https://doi.org/10.1016/S2214-109X\(18\)30490-X](https://doi.org/10.1016/S2214-109X(18)30490-X) PMID: 30683241
35. Houben RMGJ, Dodd PJ. The Global Burden of Latent Tuberculosis Infection: A Re-estimation Using Mathematical Modelling. *PLoS Med*. 2016;13(10):e1002152. <https://doi.org/10.1371/journal.pmed.1002152> PMID: 27780211
36. Ghosh K, Ghosh K. Strongyloides stercoralis septicaemia following steroid therapy for eosinophilia: report of three cases. *Trans R Soc Trop Med Hyg*. 2007;101(11):1163–5. <https://doi.org/10.1016/j.trstmh.2007.05.021> PMID: 17662320
37. Keiser PB, Nutman TB. Strongyloides stercoralis in the Immunocompromised Population. *Clin Microbiol Rev*. 2004;17(1):208–17. <https://doi.org/10.1128/CMR.17.1.208-217.2004> PMID: 14726461
38. Ai JW, Ruan QL, Liu QH, Zhang WH. Updates on the risk factors for latent tuberculosis reactivation and their managements. *Emerg Microbes Infect*. 2016;5(2):e10.
39. Bern C, Montgomery SP, Herwaldt BL, Rassi AJ, Marin-Neto JA, Dantas RO, et al. Evaluation and treatment of chagas disease in the United States: a systematic review. *JAMA*. 2007;298(18):2171–81.
40. Cardoso CS, Ribeiro ALP, Oliveira CDL, Oliveira LC, Ferreira AM, Bierrenbach AL, et al. Beneficial effects of benznidazole in Chagas disease: NIH SaMi-Trop cohort study. *PLoS Negl Trop Dis*. 2018;12(11):e0006814. <https://doi.org/10.1371/journal.pntd.0006814> PMID: 30383777
41. Bern C. Antitrypanosomal therapy for chronic Chagas' disease. *N Engl J Med*. 2011 Jun 30;364(26):2527–34.
42. Altcheh J, Castro L, Dib JC, Grossmann U, Huang E, Moscatelli G, et al. Prospective, historically controlled study to evaluate the efficacy and safety of a new paediatric formulation of nifurtimox in children aged 0 to 17 years with Chagas disease one year after treatment (CHICO). *PLoS Negl Trop Dis*. 2021;15(1):e0008912. <https://doi.org/10.1371/journal.pntd.0008912> PMID: 33412557
43. Torrico F, Gascón J, Barreira F, Blum B, Almeida IC, Alonso-Vega C. New regimens of benznidazole monotherapy and in combination with fosravuconazole for treatment of Chagas disease (BENDITA): a phase 2, double-blind, randomised trial. *Lancet Infect Dis*. 2021;21(8):1129–40.
44. Bosch-Nicolau P, Fernández ML, Sulleiro E, Villar JC, Perez-Molina JA, Correa-Oliveira R, et al. Efficacy of three benznidazole dosing strategies for adults living with chronic Chagas disease (MULTIBENZ): an international, randomised, double-blind, phase 2b trial. *Lancet Infect Dis*. 2024;24(4):386–94.
45. Navarrete MN, Gutiérrez-Gutiérrez B, de Arellano-Ramos R, Del Castillo SF, Domínguez-Castellano Á. Low incidence of adverse effects using a progressive regimen of benznidazole in Chagas disease. *Clin Infect Dis*. 2016;62(8):1052.
46. National Cancer Institute. Common Terminology Criteria for Adverse Events Version 5.0. Bethesda: NIH; 2017. p. 155.
47. Crespillo-Andújar C, Comeche B, Hamer DH, Arevalo-Rodríguez I, Alvarez-Díaz N, Zamora J, et al. Use of benznidazole to treat chronic Chagas disease: An updated systematic review with a meta-analysis. *PLoS Negl Trop Dis*. 2022;16(5):e0010386. <https://doi.org/10.1371/journal.pntd.0010386> PMID: 35576215
48. Pinazo MJ, Muñoz J, Posada E, López-Chejade P, Gállego M, Ayala E. Tolerance of benznidazole in treatment of Chagas' disease in adults. *Antimicrobial Agents and Chemotherapy*. 2010;54(11):4896–9.
49. Jackson Y, Alirol E, Getaz L, Wolff H, Combescure C, Chappuis F. Tolerance and safety of nifurtimox in patients with chronic chagas disease. *Clin Infect Dis*. 2010;51(10):e69–75. <https://doi.org/10.1086/656917> PMID: 20932171
50. Hasslocher-Moreno AM, do Brasil PEAA, de Sousa AS, Xavier SS, Chambela MC, Sperandio da Silva GM. Safety of benznidazole use in the treatment of chronic Chagas' disease. *J Antimicrob Chemother*. 2012;67(5).
51. Crespillo-Andújar C, Venanzi-Rullo E, López-Vélez R, Monge-Maillo B, Norman F, López-Polín A, et al. Safety Profile of Benznidazole in the Treatment of Chronic Chagas Disease: Experience of a Referral Centre and Systematic Literature Review with Meta-Analysis. *Drug Saf*. 2018;41(11):1035–48. <https://doi.org/10.1007/s40264-018-0696-5> PMID: 30006773
52. Crespillo-Andújar C, López-Vélez R, Trigo E, Norman F, Díaz-Menéndez M, Monge-Maillo B. Comparison of the toxicity of two treatment schemes with benznidazole for chronic Chagas disease: a prospective cohort study in two Spanish referral centres. *Clin Microbiol Infect*. 2020;26(3):384.e1–384.e4.

53. Losada GI, Madrid PO, Herrero-Martínez JM, Pérez-Ayala A, Lizasoain HM. Does Progressive Introduction of Benznidazole Reduce the Chance of Adverse Events in the Treatment of Chagas Disease? *Am J Trop Med Hyg.* 2019 Jun;100(6):1477–81.
54. Bosch-Nicolau P, Salvador F, Sánchez-Montalvá A, Franco-Jarava C, Arrese-Muñoz I, Sulleiro E. Association of HLA-B\*35 and moderate or severe cutaneous reactions secondary to benznidazole treatment in chronic chagas disease. *Clin Microbiol Infect.* 2022;28(6):881.e1–881.e5.
55. Andrade JP, Marin Neto JA, Paola AAV, Vilas-Boas F, Oliveira GMM, Bacal F, et al. I Latin American Guidelines for the diagnosis and treatment of Chagas' heart disease: executive summary. *Arq Bras Cardiol.* 2011;96(6):434–42. <https://doi.org/10.1590/s0066-782x2011000600002> PMID: [21789345](https://pubmed.ncbi.nlm.nih.gov/21789345/)
56. Bern C, Messenger LA, Whitman JD, Maguire JH. Chagas Disease in the United States: a Public Health Approach. *Clin Microbiol Rev.* 2019;33(1):e00023–19. <https://doi.org/10.1128/CMR.00023-19> PMID: [31776135](https://pubmed.ncbi.nlm.nih.gov/31776135/)
